# Supplementary material for: Retrievals of XCO 2 , XCH 4 and XCO from portable, near-infrared Fourier transform spectrometer solar observations in Antarctica
Source: Copernicus journal article supplement (doi:10.5194/essd-2022-130), 2022-08-26

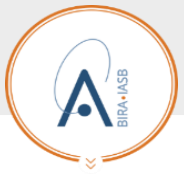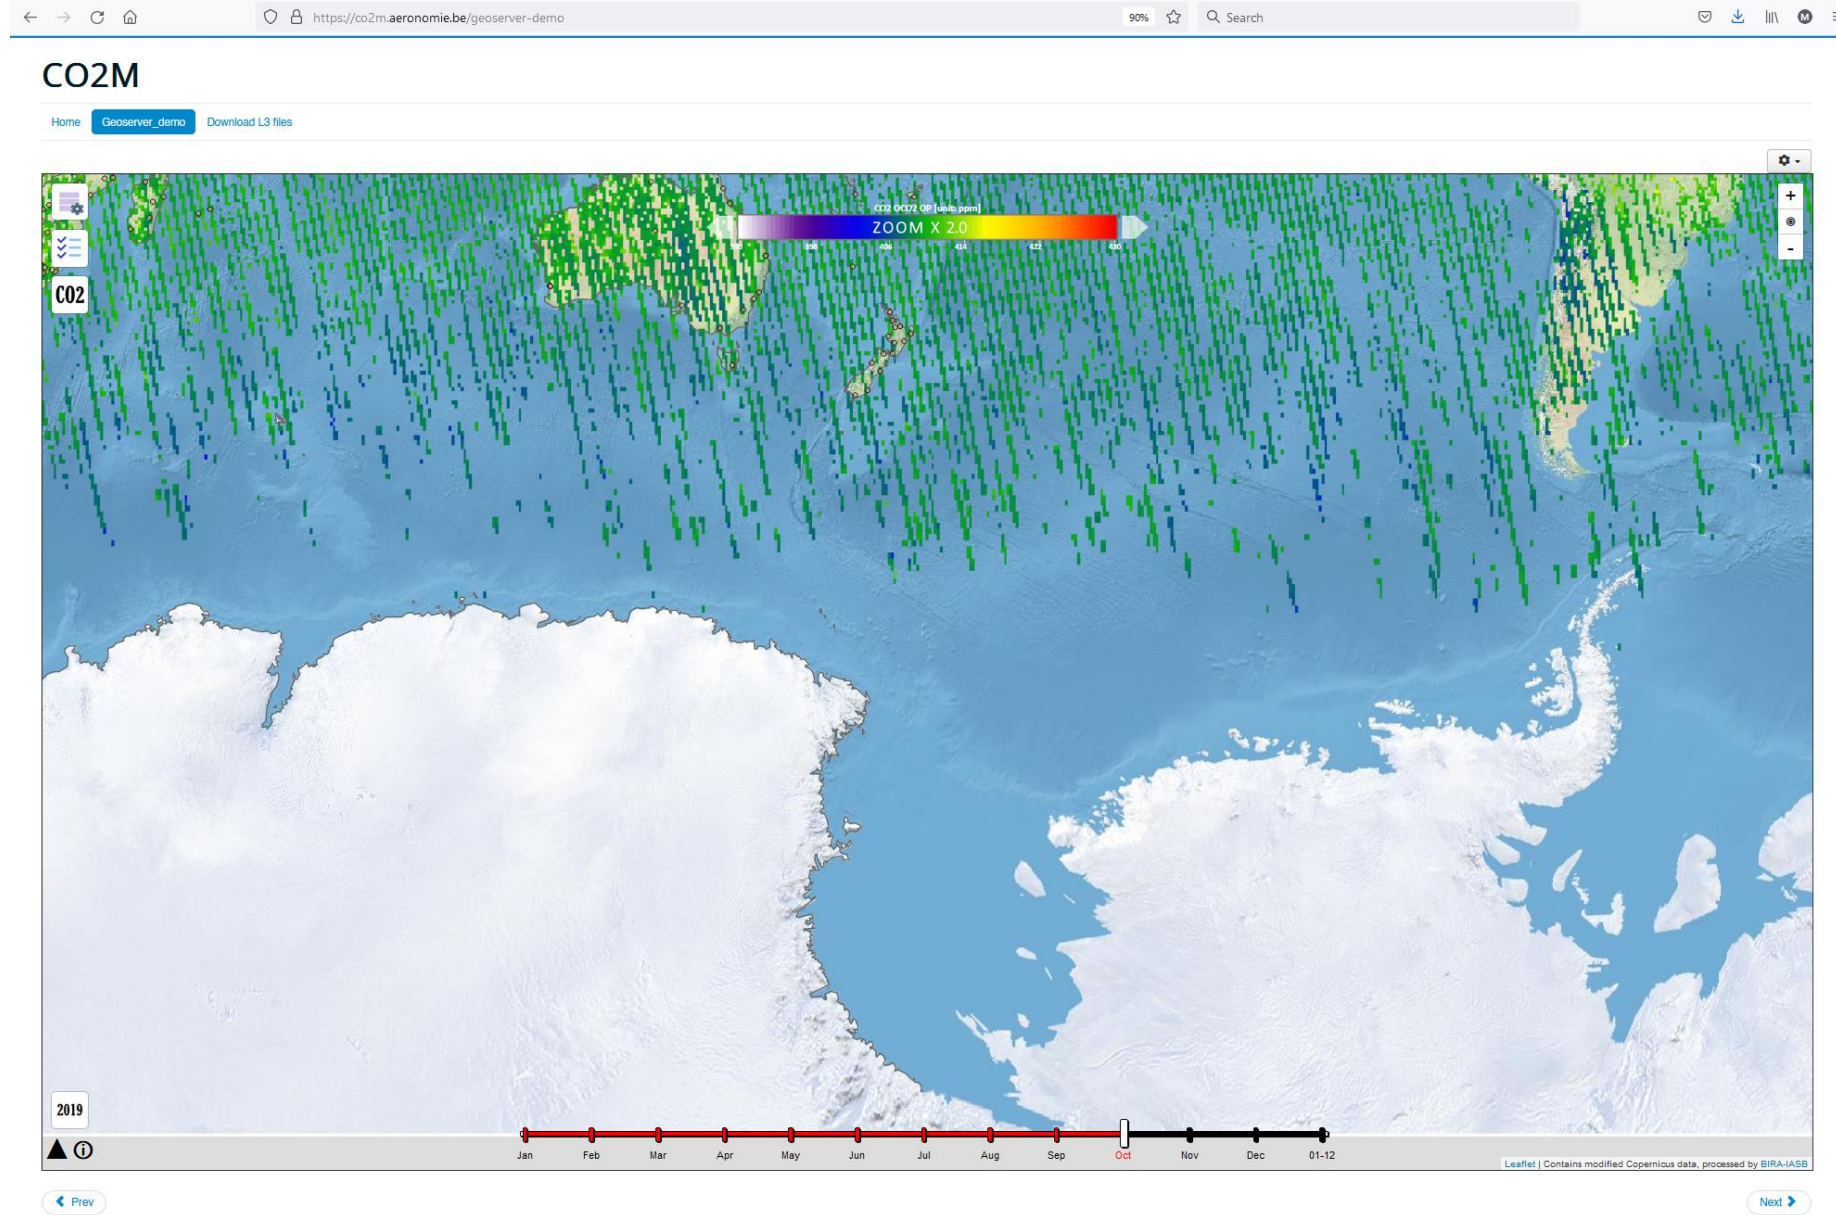

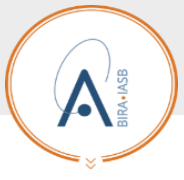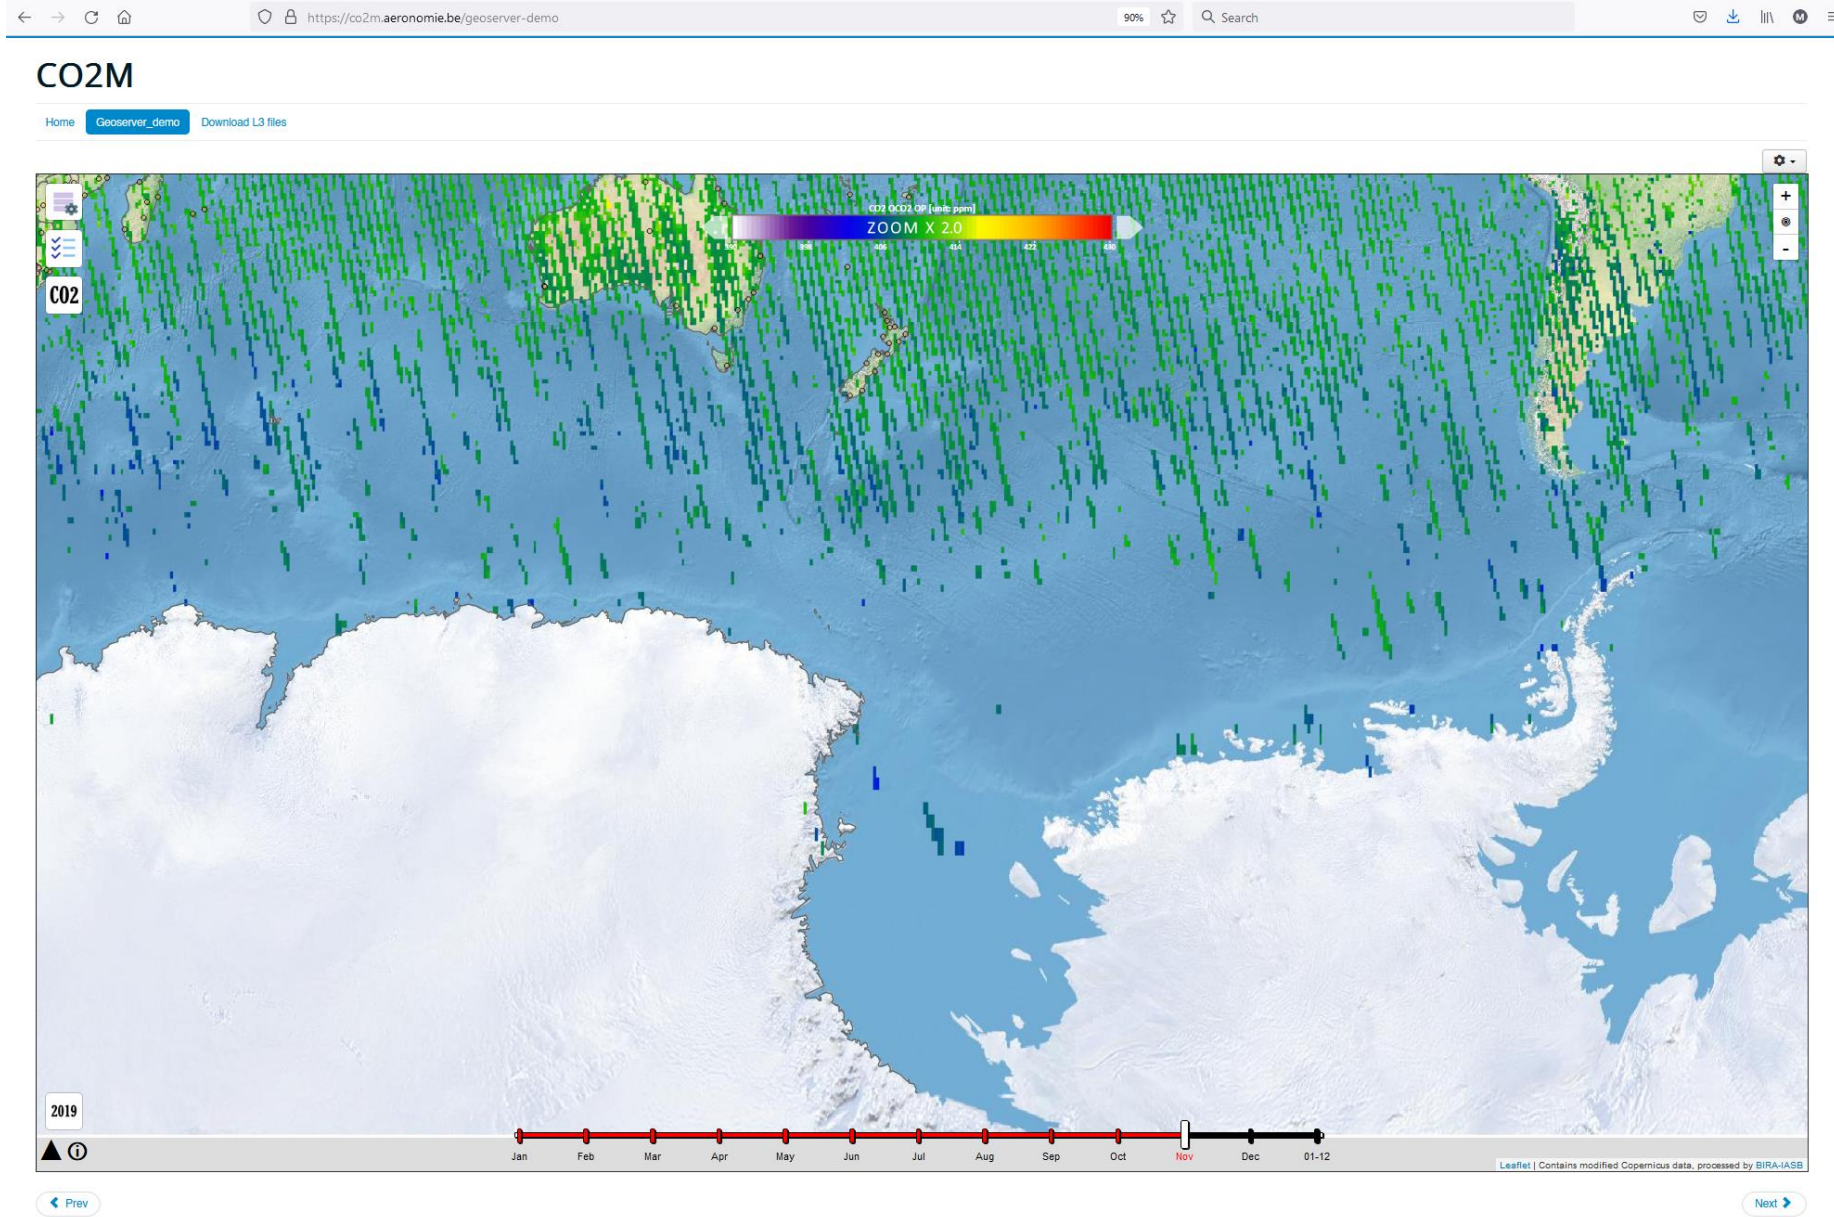



## CO2M

Home [Geoserver\\_demo](#) [Download L3 files](#)

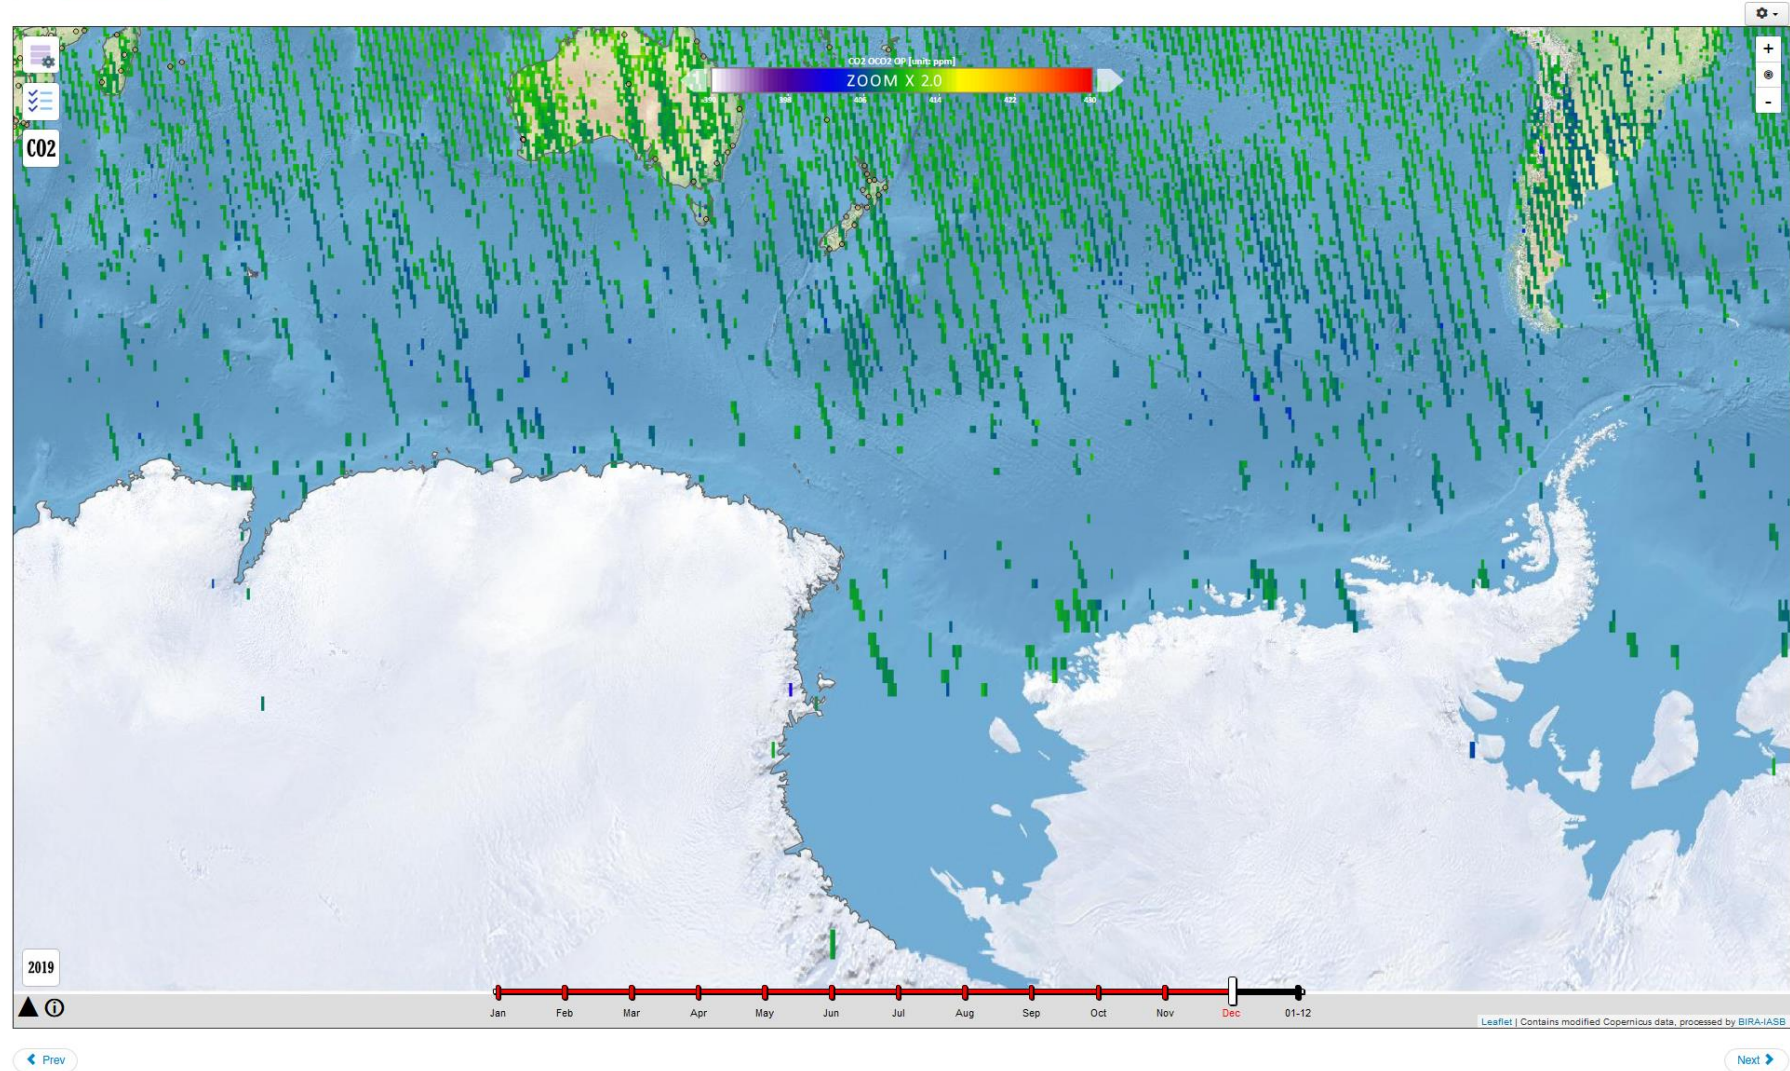

← Prev

Next →

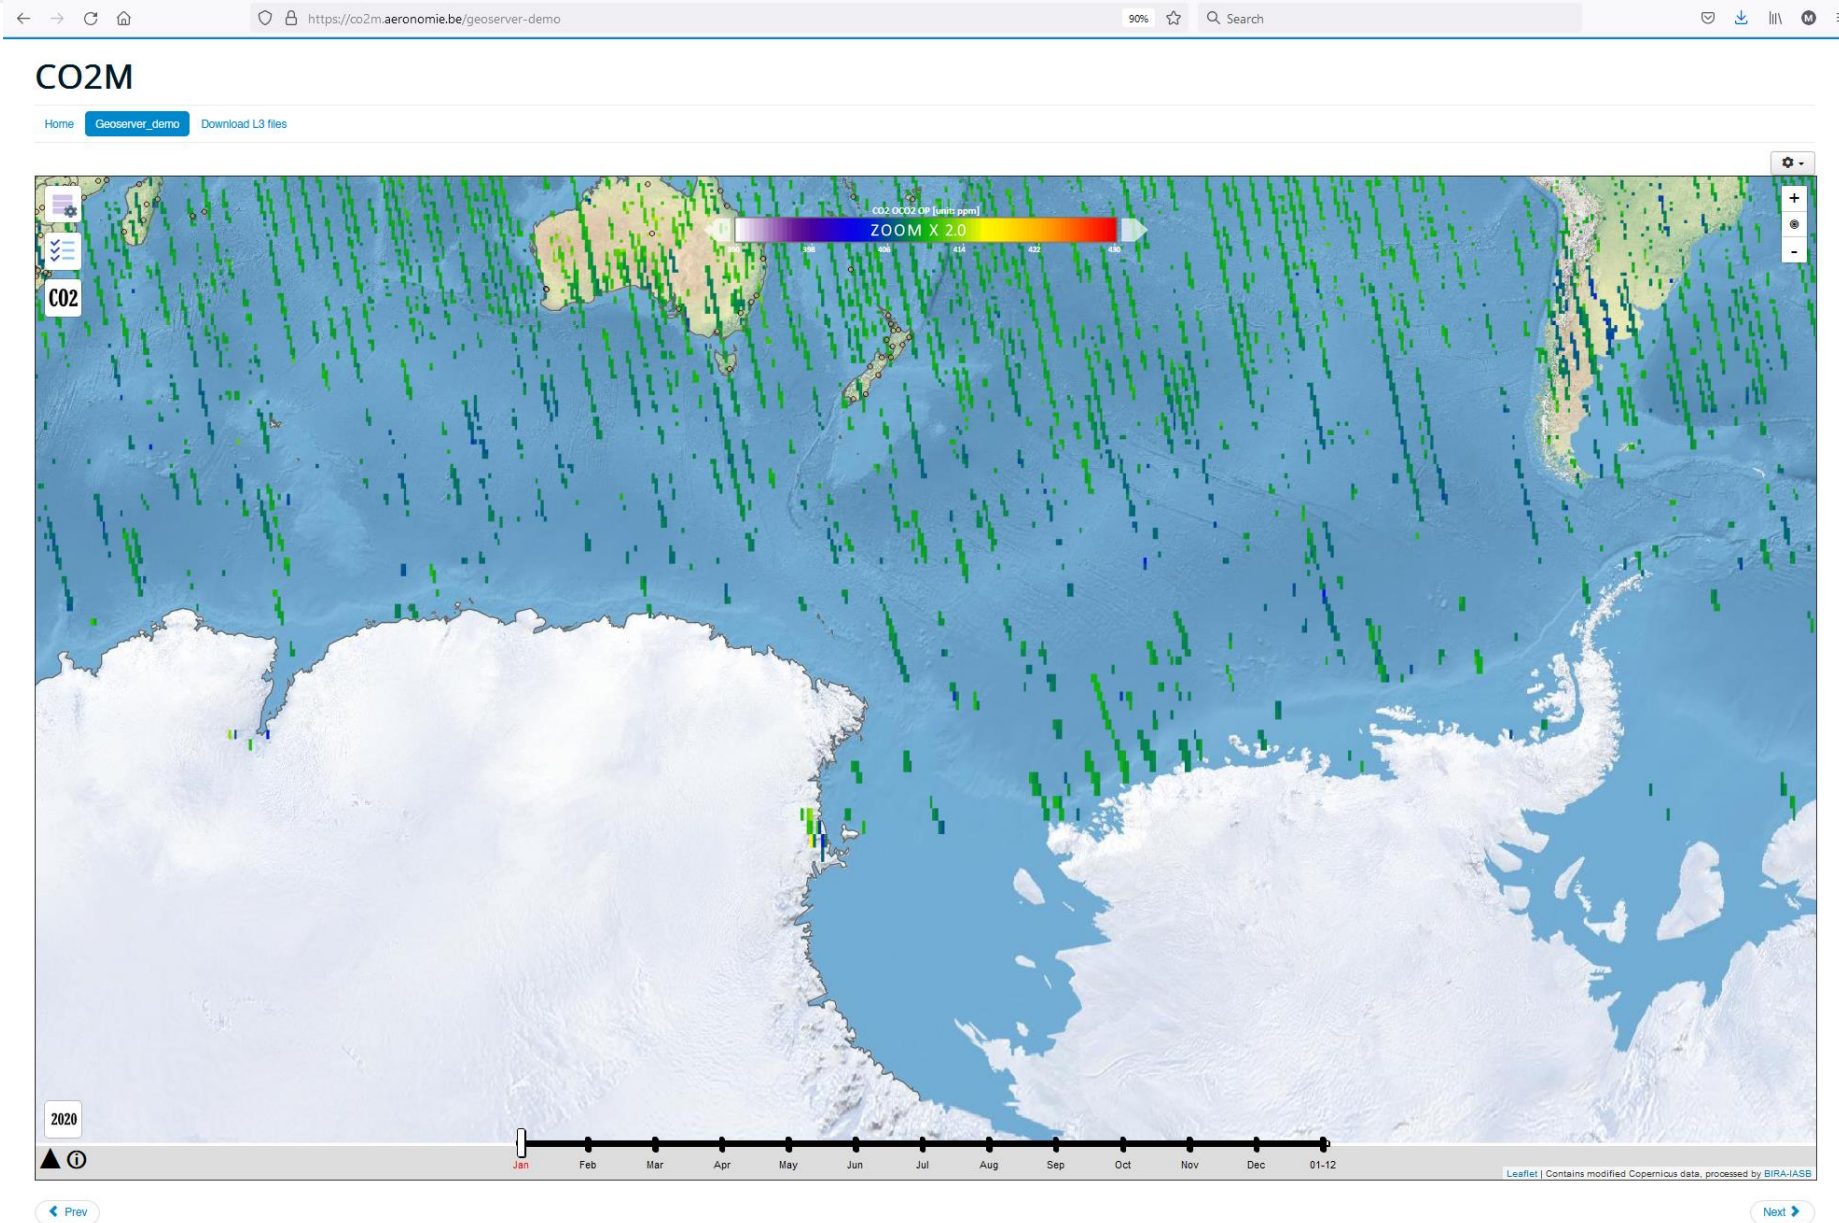

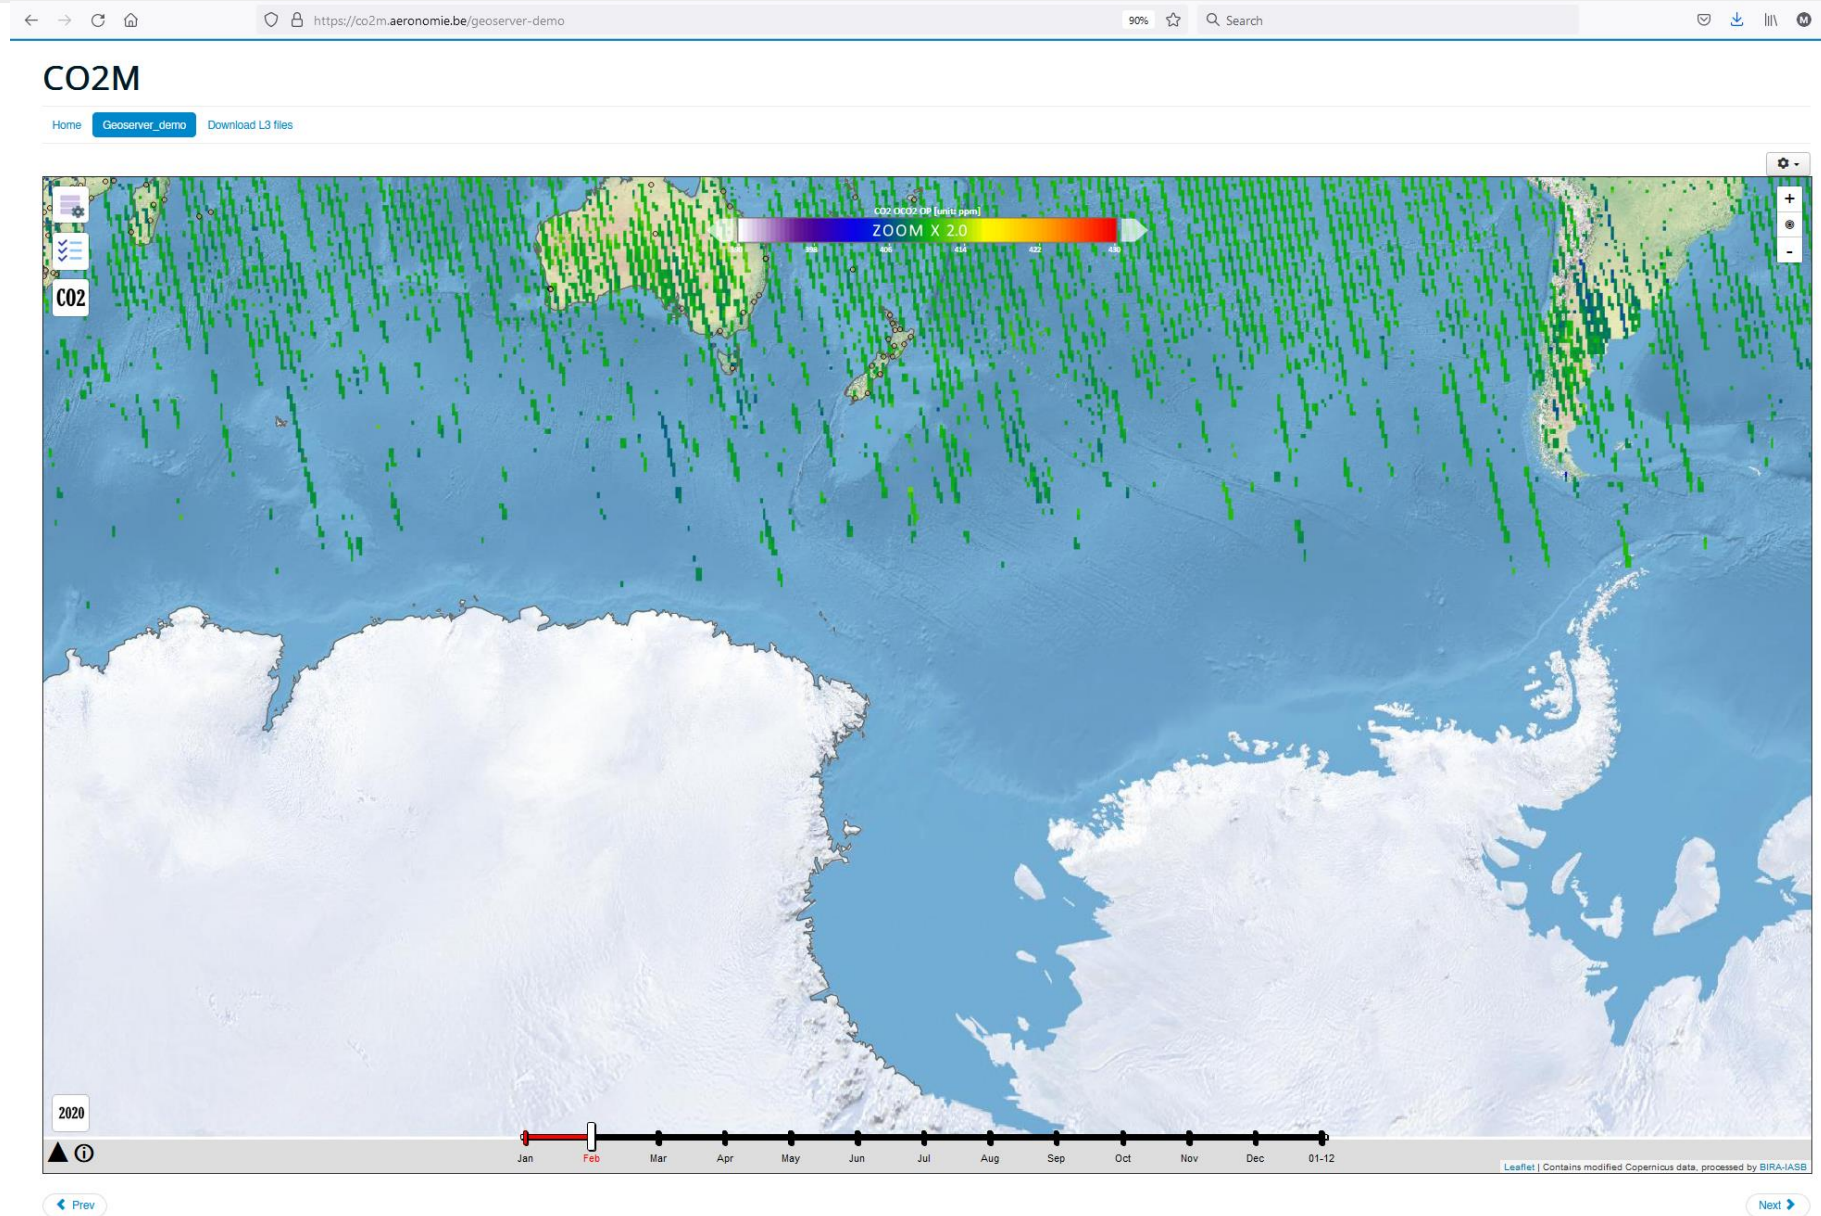

## CO2M

Home [Geoserver\\_demo](#) [Download L3 files](#)

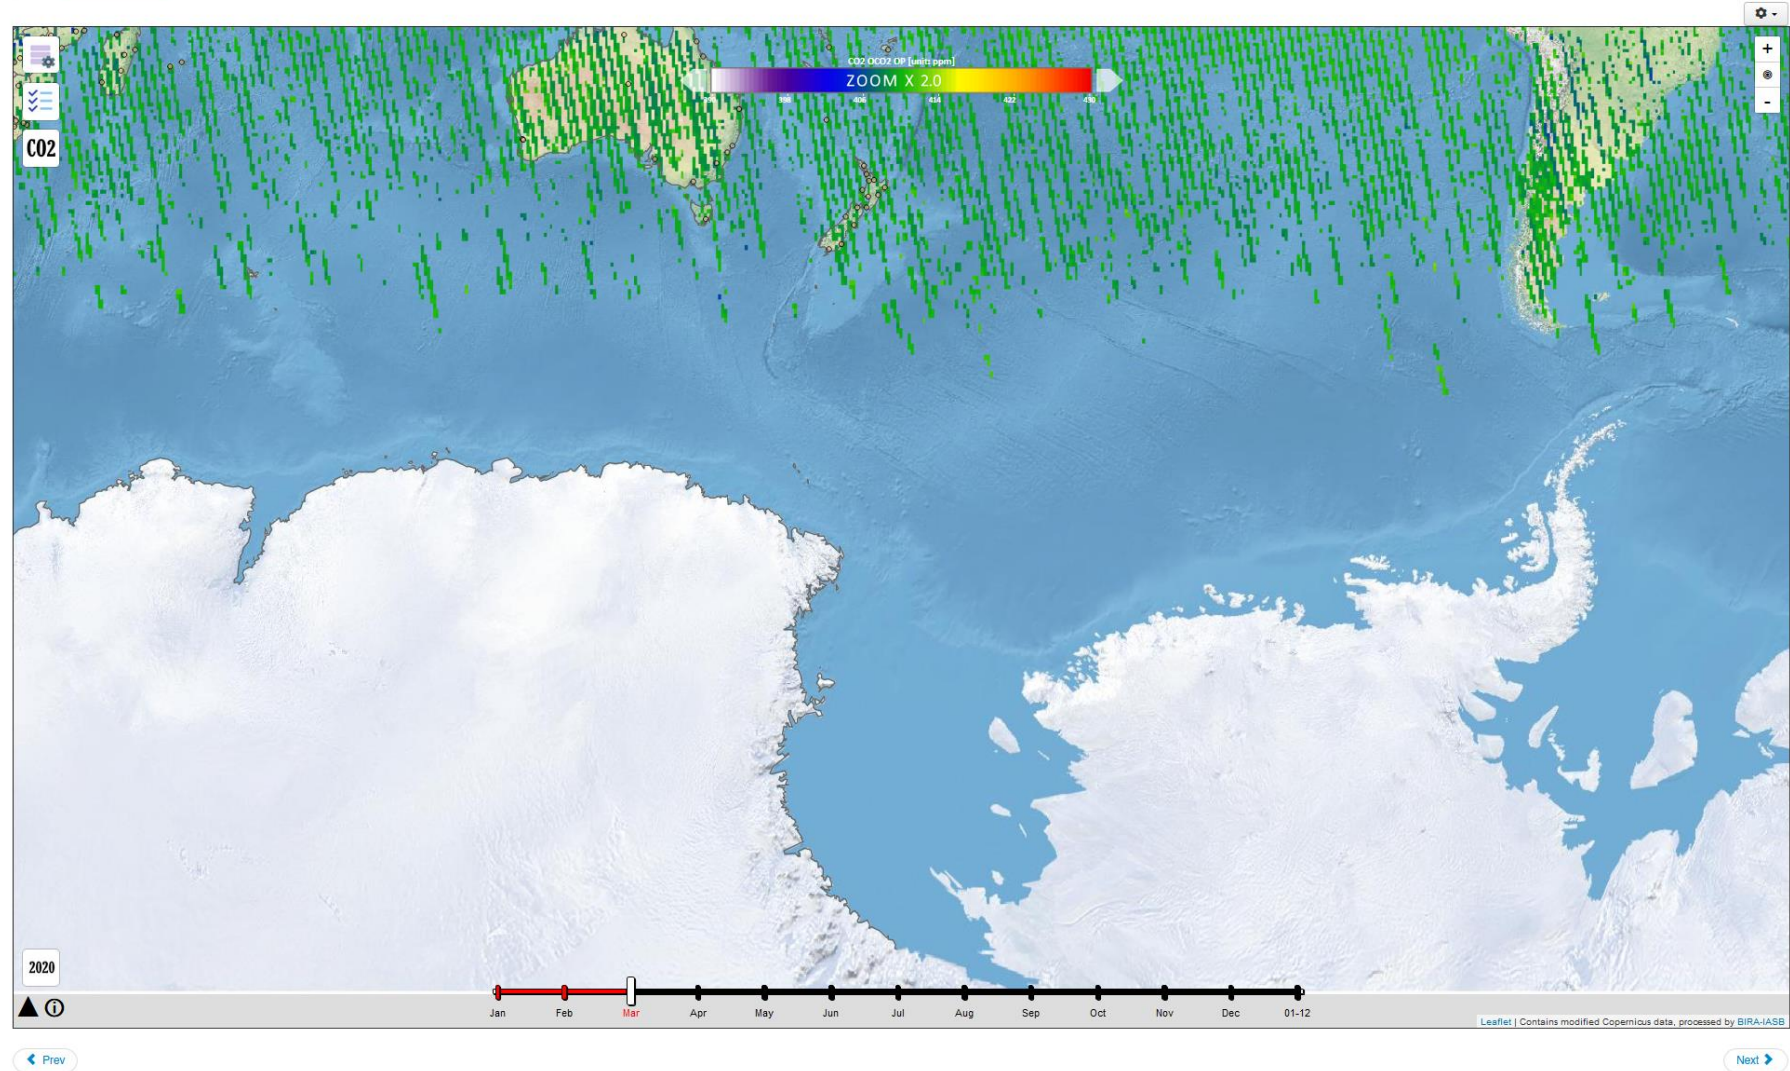

Supplement: Supplementary file [file essd-2022-130-AC1-supplement.pdf]
